# Supplementary material
Source: PubMed Central journal article supplement (PMC1166584)

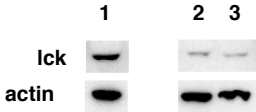

Supplement: pnas_0406333102_1.pdf [file pnas_0406333102_1.pdf]

|                  |          |          |          |          |
|------------------|----------|----------|----------|----------|
| <b>IVT</b>       | <b>-</b> | <b>+</b> | <b>-</b> | <b>+</b> |
| <b>calpeptin</b> | <b>-</b> | <b>-</b> | <b>+</b> | <b>+</b> |

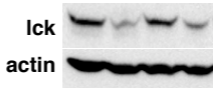

Supplement: pnas_0406333102_2.pdf [file pnas_0406333102_2.pdf]

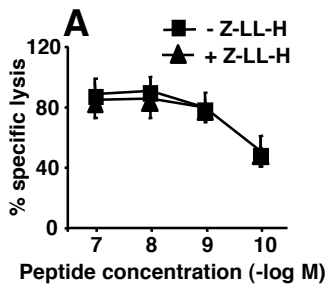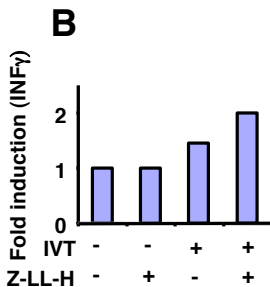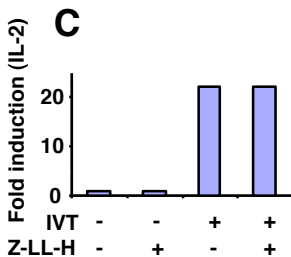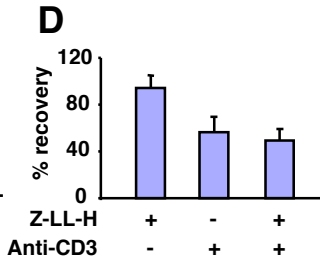

Supplement: pnas_0406333102_3.pdf [file pnas_0406333102_3.pdf]
